# Supplementary material
Source: PubMed Central journal article supplement (PMC1913905)

*C. albicans*

*K. lactis*

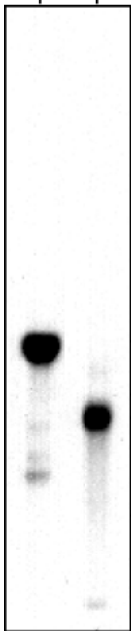

(nt)

1600

1400

1300

1000

Supplement: pnas_0700327104_1.pdf [file pnas_0700327104_1.pdf]

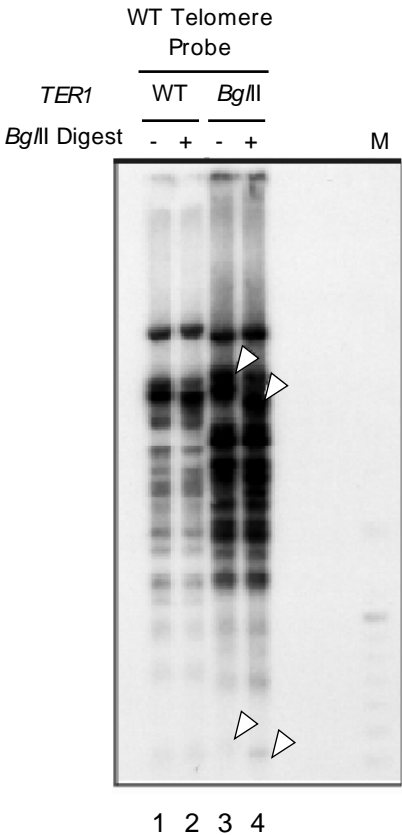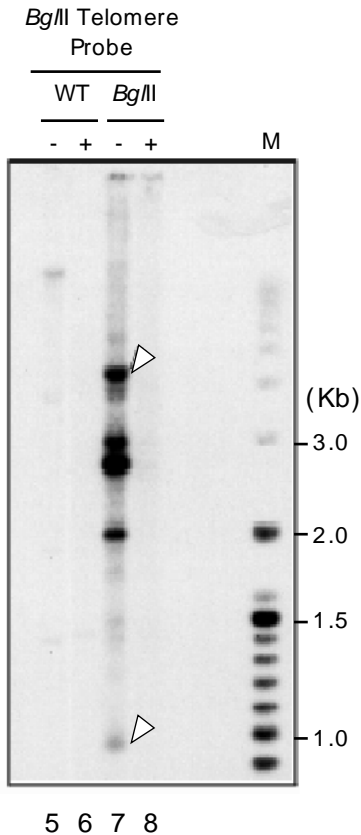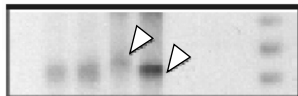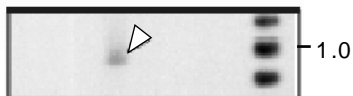

Supplement: pnas_0700327104_2.pdf [file pnas_0700327104_2.pdf]

**A**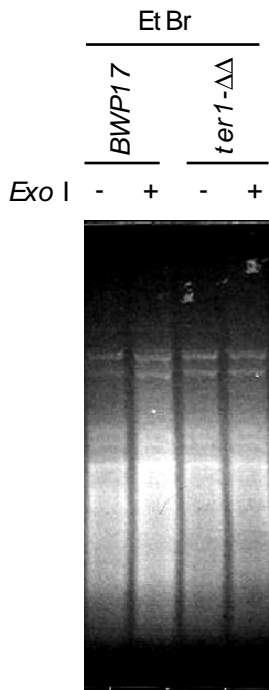**B**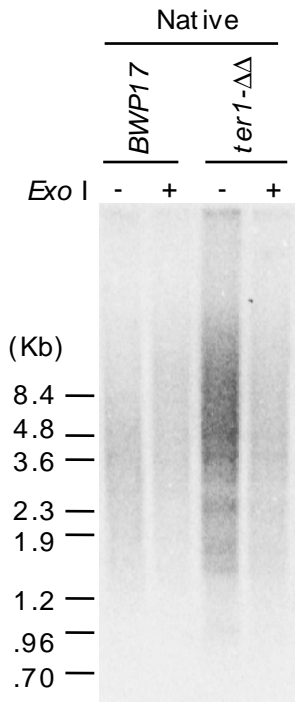**C**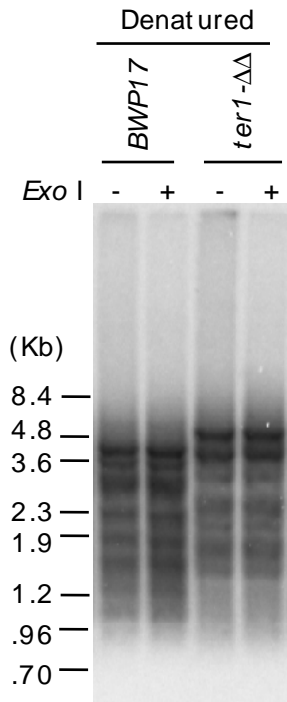

Supplement: pnas_0700327104_3.pdf [file pnas_0700327104_3.pdf]

**A**

G-strand

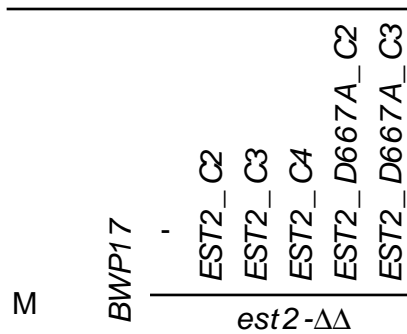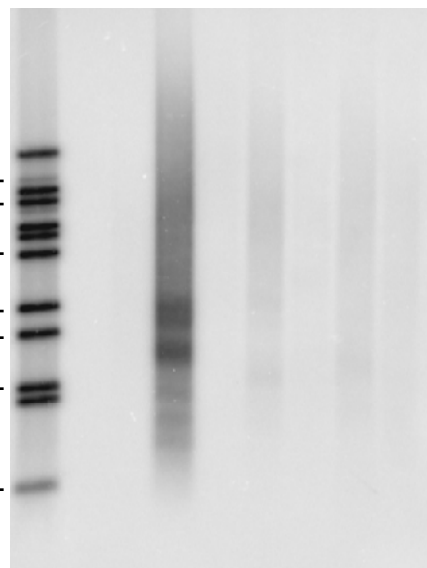**B**

Total telomeres

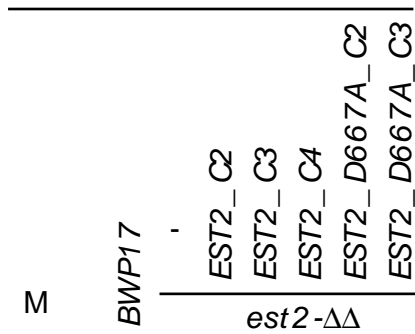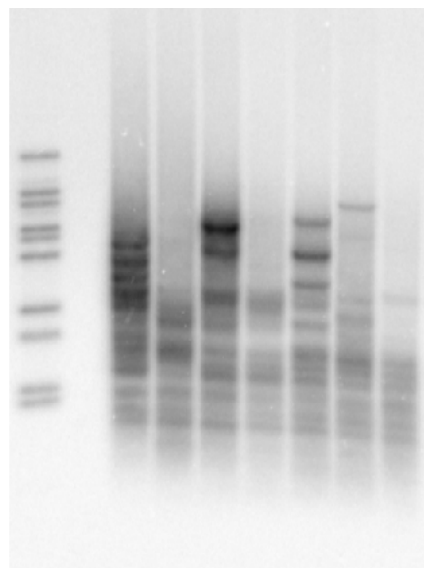

Supplement: pnas_0700327104_4.pdf [file pnas_0700327104_4.pdf]
